# Supplementary material for: Ultralow-intensity near infrared light synchronously activated collaborative chemo/photothermal/photodynamic therapy
Source: Royal Society of Chemistry journal article supplement (doi:10.1039/c9bm01607d), 2019-11-14
Supplement: c9bm01607d1.pdf [file c9bm01607d1.pdf]

## Supplementary Information

### **Ultralow-intensity near infrared light synchronously activated collaborative Chemo/Photothermal/Photodynamic therapy**

Renlu Han<sup>a, \*</sup>, Keqi Tang<sup>a</sup>, Yafei Hou<sup>b</sup>, Jiancheng Yu<sup>c</sup>, Chenlu Wang<sup>a</sup>, You Wang<sup>d,\*</sup>

<sup>a</sup> State Key Laboratory Base of Novel Functional Materials and Preparation Science, School of Materials Science & Chemical Engineering, Ningbo University, Ningbo, Zhejiang 315211, China

<sup>b</sup> Department of Microelectronic Science and Engineering, Ningbo University, Ningbo 315211, P. R. China

<sup>c</sup> Faculty of Electrical Engineering and Computer Science, Ningbo University, Ningbo 315211, P. R. China

<sup>d</sup> School of Materials Science and Engineering, Harbin Institute of Technology, Harbin 150001, P. R. China.

\* Corresponding author

E-mail addresses: hanrenlu@nbu.edu.cn (R. L. Han), y-wang@hit.edu.cn (Y. Wang)

Fax: (+86) 0574-87600727

## *1. Details of process for UCNP synthesis*

### *1.1. Synthesis of NaYF<sub>4</sub>:Yb/Er nanoparticles*

YCl<sub>3</sub>•6H<sub>2</sub>O (1.56 mmol), YbCl<sub>3</sub>•6H<sub>2</sub>O (0.4 mmol), and ErCl<sub>3</sub>•6H<sub>2</sub>O (0.04 mmol) were added to a 250 mL three-neck round-bottom flask containing oleic acid (12 mL) and 1-octadecene (30 mL). In the presence of argon, the mixture was slowly heated to 160 °C and kept at this temperature for 120 min under vigorous magnetic stirring. After the mixture was cooled down to 50 °C, a solution of ammonium fluoride (8 mmol) and sodium hydroxide (5 mmol) dissolved in methanol (15 mL) was added, then the mixture was stirred at 50 °C for 30 min. After methanol was evaporated, the solution was heated to 300 °C and kept at this temperature for 60 min. When the reaction was completed, the mixture was cooled down to room temperature. The particles were centrifuged and washed 3 times by ethanol, and then the particles were dispersed in 10 mL cyclohexane.

### *1.2. Synthesis of core-shell structured YF<sub>4</sub>:Yb/Er@NaYF<sub>4</sub>:Yb:Nd nanoparticles*

2.0 mmol as-prepared NaYF<sub>4</sub>:Yb/Er@NaYF<sub>4</sub>:Yb:Nd nanoparticles (dispersed in cyclohexane), YCl<sub>3</sub>•6H<sub>2</sub>O (0.5 mmol), YbCl<sub>3</sub>•6H<sub>2</sub>O (0.1 mmol) and NdCl<sub>3</sub>•6H<sub>2</sub>O (0.4 mmol) were added to a 250 mL three-neck round-bottom flask containing oleic acid (12 mL) and 1-octadecene (30 mL). The mixture was slowly heated to 160 °C and kept at this temperature for 120 min under vigorous magnetic stirring under argon atmosphere. After the mixture was cooled down to 50 °C, a solution of ammonium fluoride (4 mmol) and sodium hydroxide (2.5 mmol) dissolved in methanol (15 mL) was added, and the mixture was stirred at 50 °C for 30 min. After methanol was evaporated, the solution was heated to 300 °C and kept at this temperature for 90 min. When the reaction was completed, the mixture was cooled down to room temperature.

The particles were centrifuged and washed 3 times by ethanol, and Then the particles used as UCNP cores were dispersed in 10 mL cyclohexane.

*1.3. Synthesis of core-shell-shell structured  $\text{NaYF}_4\text{:Yb/Er@NaYF}_4\text{:Yb:Nd@NaYF}_4$  (UCNP) nanoparticles*

2.0 mmol as-prepared  $\text{NaYF}_4\text{:Yb/Er@NaYF}_4\text{:Yb:Nd}$  nanoparticles (dispersed in cyclohexane), and  $\text{YCl}_3\cdot 6\text{H}_2\text{O}$  (1.4 mmol) were added to a 250 mL three-neck round-bottom flask containing oleic acid (12 mL) and 1-octadecene (30 mL). The mixture was slowly heated to 160 °C and kept at this temperature for 120 min under vigorous magnetic stirring under argon atmosphere. After the mixture was cooled down to 50 °C, a solution of ammonium fluoride (5.6 mmol) and sodium hydroxide (3.5 mmol) dissolved in methanol (15 mL) was added, and the mixture was stirred at 50 °C for 30 min. After methanol was evaporated, the solution was heated to 300 °C and kept at this temperature for 90 min. When the reaction was completed, the mixture was cooled down to room temperature. The particles were centrifuged and washed 3 times by ethanol, and then the particles used as UCNP cores were dispersed in 20 mL cyclohexane.

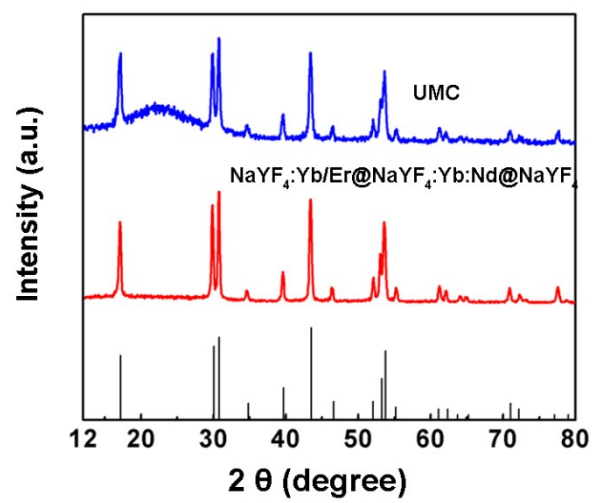

**Figure S1.** XRD patterns of UCNPs and UMC.

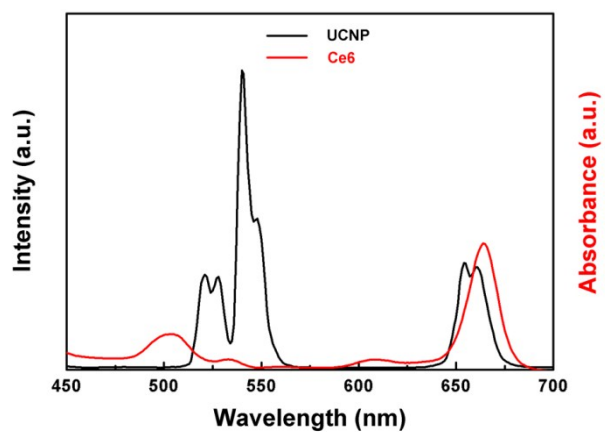

**Figure S2.** Upconversion fluorescent spectra of YF<sub>4</sub>:Yb/Er@NaYF<sub>4</sub>:Yb:Nd@NaYF<sub>4</sub> (black) under NIR light excitation ( $\lambda = 808$  nm,  $2.0 \text{ W cm}^{-2}$ ) and UV-vis absorption of Ce6 (red).

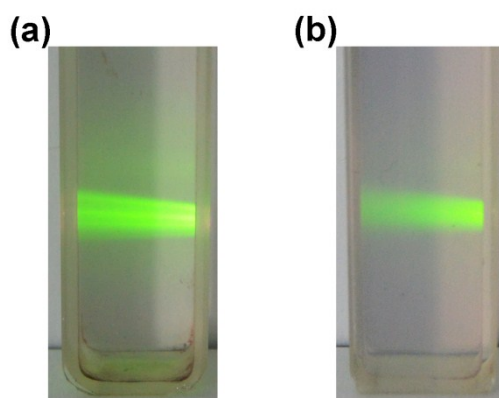

**Figure S3.** (a) Upconversion fluorescent photographs of core-shell-shell structured  $\text{NaYF}_4:\text{Yb}/\text{Er}@\text{NaYF}_4:\text{Yb}:\text{Nd}@\text{NaYF}_4$  under ultralow-power 808 nm light excitation (0.3 W). (b) The widely used  $\text{NaYF}_4:\text{Yb}/\text{Er}$  under high-power 980 nm light excitation (2.0 W).

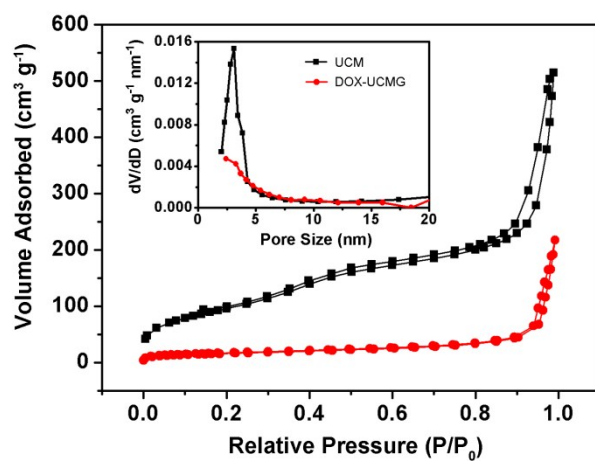

**Figure S4.**  $\text{N}_2$  absorption–desorption isotherm and pore distribution of UCM and DOX-UCMG.

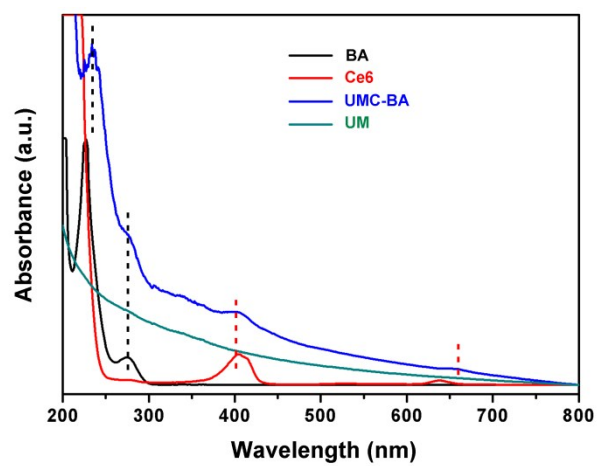

**Figure S5.** UV-vis spectra of BA, Ce6, UMC-BA and UM.

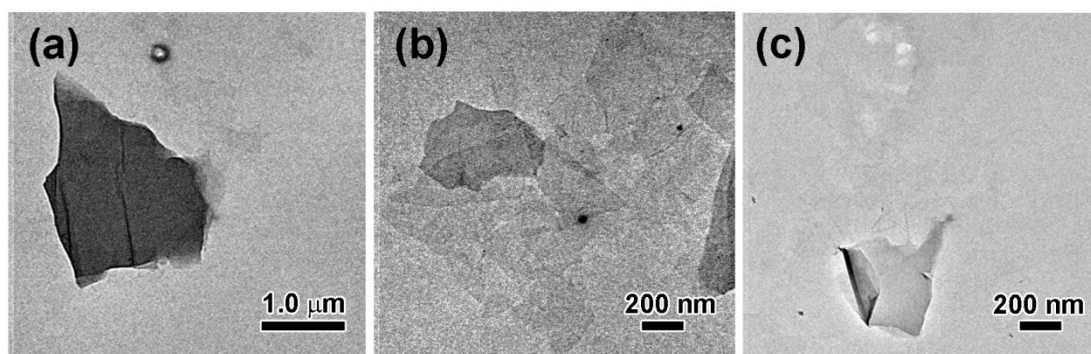

**Figure S6.** TEM images of (a) GO flake, and (b, c) a single layer GO sheet.

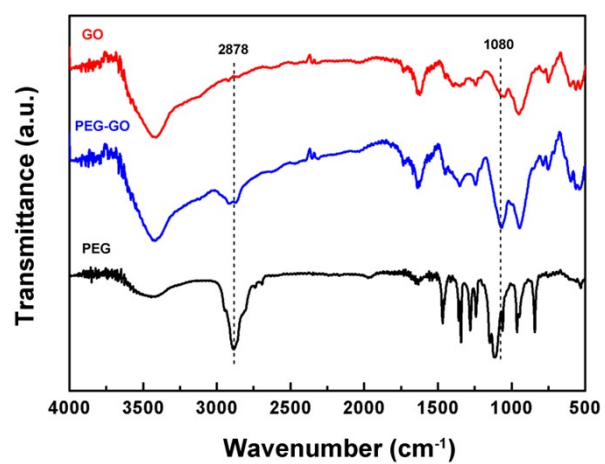

Figure S7. FT-IR of GO, PEG-GO and PEG.

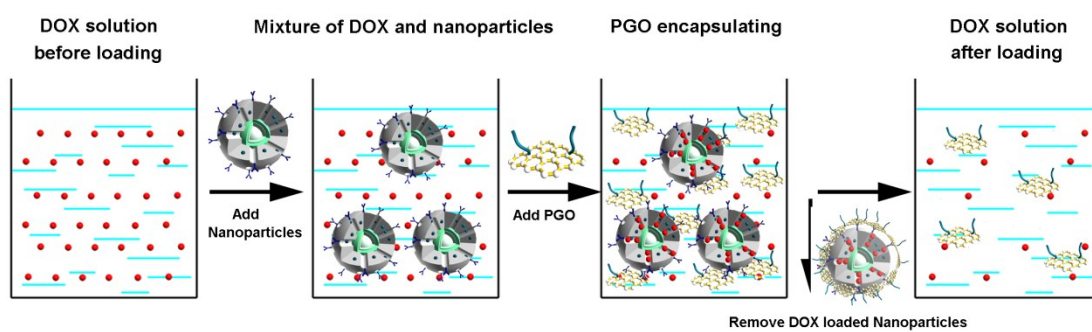

**Figure S8.** Schematic illustration of DOX loading and PGO encapsulating.

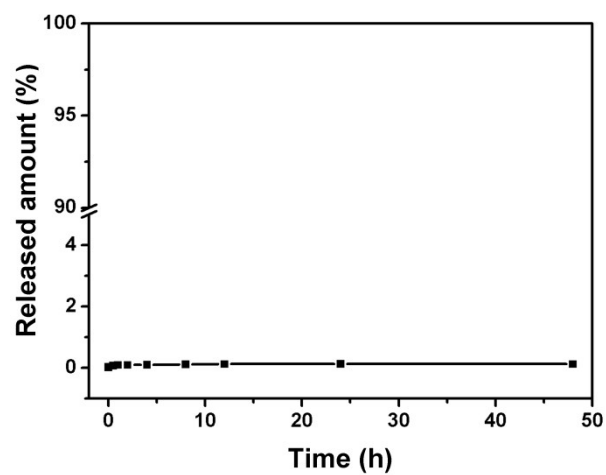

**Figure S9.** Release profile of Ce6 from DOX-UMCG nanoparticles.

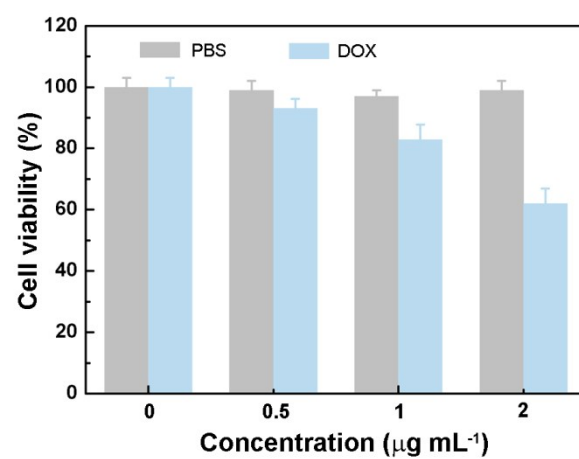

**Figure S10.** Viabilities of HeLa cells treated with the same DOX dosage.

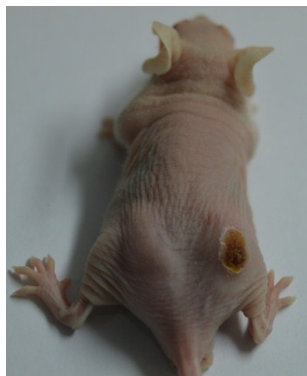

**Figure S11.** Photodamage of the mice after continuous 10 min of 808 nm light irradiation with 2.0 W/cm<sup>2</sup>, which suggests the employment of ultralow-intensity NIR light for phototherapy to avoid photodamage is quite essential.

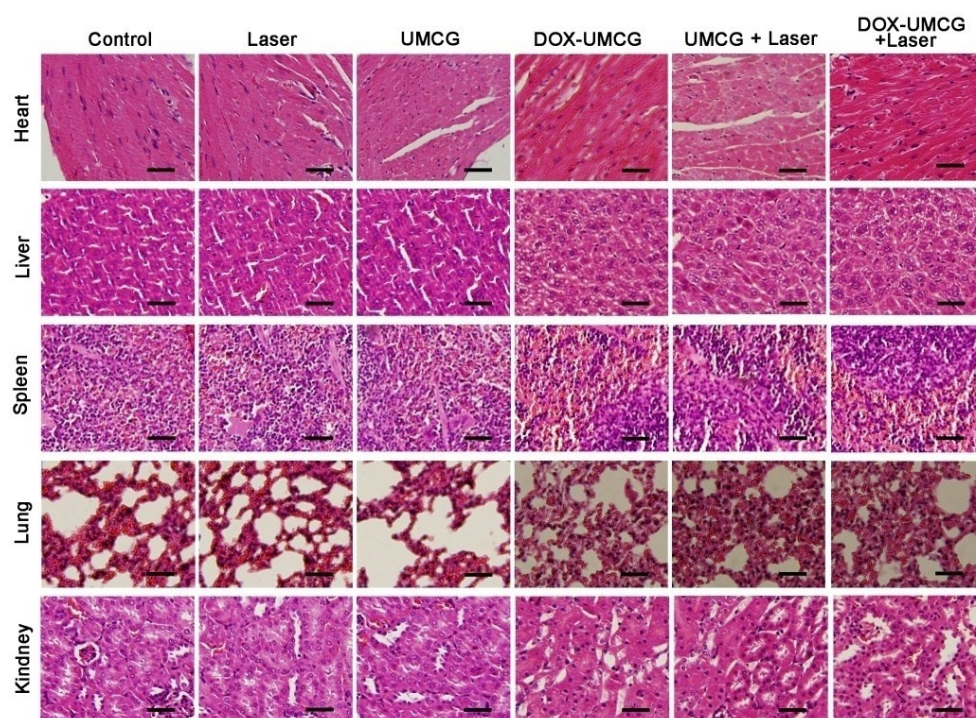

**Figure S12.** H&E staining of major organs collected from mice after various treatments.

Scale bars for all images are 50  $\mu$ m.
